# Supplementary material for: Brief communication: Comprehensive Resilience to Typhoon Disasters: An Urban Assessment of 27 Cities in Seven Major River Basin, China
Source: Copernicus journal article supplement (doi:10.5194/egusphere-2024-2343), 2024-10-08
Supplement: Supplementary file [file egusphere-2024-2343-AC1-supplement.pdf]

Appendix

Partly raw data of constructed indicators.

|           |      | GDP per capita (yuan) | Per capita fiscal expenditure (yuan) | Per capita disposable income (Yuan) | Proportion of government expenditure on medical and health care (%) | Population density (people/km <sup>2</sup> ) | Proportion of permanent urban population aged 65 and above and 14 and below in total permanent urban population (%) | Number of beds in hospitals and health centers per 1,000 people (units) | Annual precipitation (mm) | Average annual temperature (°C) | Annual surface runoff (billion cubic meters) | Crop sown area (thousand hectares) | Green area coverage (%) | Water conservancy project evaluation grade (Grade) | Year-end storage capacity of large and medium-sized urban reservoirs (100 million cubic meters) | Density of drainage network in built-up area (km/sq.km) | Per capita road area (square meters) | Number of national comprehensive disaster reduction demonstration communities (units) | Number of water conservancy and environmental management personnel per 10,000 population | Total number of statutory active public information published online by the Water Resources Bureau (pieces) |
|-----------|------|-----------------------|--------------------------------------|-------------------------------------|---------------------------------------------------------------------|----------------------------------------------|---------------------------------------------------------------------------------------------------------------------|-------------------------------------------------------------------------|---------------------------|---------------------------------|----------------------------------------------|------------------------------------|-------------------------|----------------------------------------------------|-------------------------------------------------------------------------------------------------|---------------------------------------------------------|--------------------------------------|---------------------------------------------------------------------------------------|------------------------------------------------------------------------------------------|-------------------------------------------------------------------------------------------------------------|
| Harbin    | 2022 | 58436                 | 11341.13                             | 43981                               | 10.56%                                                              | 184.7                                        | 25.10839                                                                                                            | 9.103115                                                                | 552.6                     | 5.2                             | 98.97                                        | 1492.9                             | 33.1                    | B                                                  | 129.66                                                                                          | 7.24696                                                 | 16.7                                 | 0                                                                                     | 18.74796                                                                                 | 87                                                                                                          |
|           | 2021 | 56580                 | 10518.45                             | 42745                               | 10.10%                                                              | 177.7                                        | 25.10839                                                                                                            | 9.33                                                                    | 582.9                     | 4.8                             | 116.1                                        | 1484.7                             | 33.1                    | B                                                  | 129.66                                                                                          | 8.047687                                                | 12.5                                 | 4                                                                                     | 19.76823                                                                                 | 65                                                                                                          |
|           | 2020 | 54058                 | 12253.03                             | 39791                               | 8.11%                                                               | 186                                          | 25.1                                                                                                                | 9.17                                                                    | 790.5                     | 5.4                             | 218.2                                        | 1471.2                             | 34.2                    | B                                                  | 153.87                                                                                          | 7.794926                                                | 10.3                                 | 3                                                                                     | 19.38062                                                                                 | 315                                                                                                         |
|           | 2022 | 74399                 | 10773.6                              | 43240                               | 10.07%                                                              | 14095.31                                     | 26.29169                                                                                                            | 7.414676                                                                | 774.2                     | 3.3                             | 54.63                                        | 1650.2                             | 38.44                   | B                                                  | 78.97                                                                                           | 11.46                                                   | 16.53                                | 0                                                                                     | 31.22381                                                                                 | 421                                                                                                         |
| Changchun | 2021 | 78255                 | 11347.89                             | 43281                               | 10.08%                                                              | 13890.77                                     | 26.29169                                                                                                            | 6.712739                                                                | 684.7                     | 5.8                             | 31.7                                         | 1641.1                             | 40.22                   | B                                                  | 78.97                                                                                           | 10.43                                                   | 15.99                                | 7                                                                                     | 31.22381                                                                                 | 295                                                                                                         |
|           | 2020 | 77634                 | 11608.1                              | 40001                               | 8.37%                                                               | 14065.56                                     | 15.09                                                                                                               | 7.604992                                                                | 668.3                     | 6.5                             | 31.51                                        | 1633.2                             | 36.03                   | D                                                  | 9.501                                                                                           | 10.09                                                   | 16.08                                | 12                                                                                    | 30.58434                                                                                 | 381                                                                                                         |
| Dandong   | 2021 | 39401                 | 8659.5692                            | 34804                               | 7.63%                                                               | 150                                          | 0.39851438                                                                                                          | 13.1316001                                                              | 1023.7                    | 10.2                            | 124.53                                       | 209.85                             | 40                      | A                                                  | 4.93                                                                                            | 0.035775                                                | 5.124261151                          | 0                                                                                     | 12.78882894                                                                              | 23                                                                                                          |
|           | 2020 | 35617                 | 10633.728                            | 32346                               | 7.84%                                                               | 151                                          | 0.39618878                                                                                                          | 8.0147933                                                               | 1311.4                    | 10.1                            | 109.39                                       | 209.746                            | 40                      | B                                                  | 4.51                                                                                            | 0.0334859                                               | 3.888193416                          | 0                                                                                     | 47.93054482                                                                              | 0                                                                                                           |
| Dandong   | 2021 | 39401                 | 8659.5692                            | 34804                               | 7.63%                                                               | 150                                          | 0.39851438                                                                                                          | 13.16001                                                                | 1023.7                    | 10.2                            | 124.53                                       | 209.85                             | 40                      | A                                                  | 4.93                                                                                            | 0.035775                                                | 5.124261151                          | 0                                                                                     | 12.78882894                                                                              | 23                                                                                                          |
|           | 2020 | 35617                 | 10633.728                            | 32346                               | 7.84%                                                               | 151                                          | 0.39618878                                                                                                          | 8.0147933                                                               | 1311.4                    | 10.1                            | 109.39                                       | 209.746                            | 40                      | B                                                  | 4.51                                                                                            | 0.0334859                                               | 3.888193416                          | 0                                                                                     | 47.93054482                                                                              | 0                                                                                                           |
| Beijing   | 2022 | 190313                | 34194.70769                          | 77415                               | 10.39%                                                              | 1331                                         | 27.2                                                                                                                | 5.78                                                                    | 585.4                     | 13.4                            | 7.4                                          | 147                                | 49.8                    | A                                                  | 38.06                                                                                           | 17.633904                                               | 4.9864945                            | 20                                                                                    | 56.855743                                                                                | 4390                                                                                                        |
|           | 2021 | 187526                | 32921.1368                           | 75002                               | 8.78%                                                               | 1334                                         | 25.14                                                                                                               | 5.59                                                                    | 698.4                     | 13.6                            | 31.6                                         | 122                                | 49.3                    | A                                                  | 43.1                                                                                            | 18.278479                                               | 4.9077036                            | 20                                                                                    | 53.550672                                                                                | 5198                                                                                                        |
|           | 2020 | 164158                | 32522.5217                           | 69434                               | 8.51%                                                               | 1334                                         | 25.2                                                                                                                | 5.81                                                                    | 527.1                     | 13.8                            | 8.3                                          | 102                                | 49                      | A                                                  | 31.4                                                                                            | 17.164738                                               | 4.8670626                            | 30                                                                                    | 51.037917                                                                                | 5084                                                                                                        |
|           | 2022 | 119200                | 20000                                | 48976                               | 6.47%                                                               | 1143                                         | 31.13                                                                                                               | 4.55                                                                    | 589.9                     | 13.4                            | 11.02                                        | 44350                              | 38.4                    | A                                                  | 6.81                                                                                            | 18.56                                                   | 16.11                                | 15                                                                                    | 26.66907                                                                                 | 1690                                                                                                        |
| Tianjin   | 2021 | 113732                | 22800                                | 47449                               | 8.53%                                                               | 1151                                         | 28.22                                                                                                               | 4.51                                                                    | 979.6                     | 13.4                            | 30.5                                         | 43700                              | 38.3                    | A                                                  | 9.03                                                                                            | 18.54                                                   | 15.44                                | 15                                                                                    | 26.66907                                                                                 | 1012                                                                                                        |
|           | 2020 | 101068                | 22700                                | 43854                               | 5.57%                                                               | 1163                                         | 28.8                                                                                                                | 4.44                                                                    | 600.2                     | 13.6                            | 8.6                                          | 41920                              | 37.6                    | A                                                  | 9.12                                                                                            | 19.09                                                   | 14.91                                | 22                                                                                    | 26.625811                                                                                | 1515                                                                                                        |
| Jinan     | 2022 | 128287                | 13017.65643                          | 59459                               | 11.00%                                                              | 800                                          | 16.75                                                                                                               | 8.111464                                                                | 906.8                     | 15.5                            | 23.24                                        | 623.327                            | 41.9                    | A                                                  | 3.74                                                                                            | 11.78019                                                | 21.4                                 | 2                                                                                     | 27.39177                                                                                 | 722                                                                                                         |
|           | 2021 | 122873                | 13846.40103                          | 57449                               | 8.64%                                                               | 797                                          | 16.75                                                                                                               | 7.801116                                                                | 1043.4                    | 15.6                            | 26.17                                        | 614.8                              | 41.7                    | A                                                  | 1.35                                                                                            | 10.581                                                  | 20.8                                 | 2                                                                                     | 27.39177                                                                                 | 722                                                                                                         |
|           | 2020 | 110199                | 14005.04216                          | 53328.6                             | 7.66%                                                               | 788                                          | 16.75                                                                                                               | 7.4796792                                                               | 718.3                     | 14.5                            | 13.09                                        | 614.3                              | 40.69                   | A                                                  | 1.46                                                                                            | 10.462189                                               | 20.66                                | 4                                                                                     | 28.950216                                                                                | 36                                                                                                          |
|           | 2022 | 134581                | 13082.49253                          | 45143                               | 10.34%                                                              | 507                                          | 19.25                                                                                                               | 6.2613512                                                               | 955.5                     | 13.2                            | 63.86                                        | 444.012                            | 44.2                    | A                                                  | 6.37                                                                                            | 9.97                                                    | 29.6                                 | 2                                                                                     | 26.760563                                                                                | 926                                                                                                         |
| Yantai    | 2021 | 122818                | 11336.35427                          | 42629                               | 9.75%                                                               | 509.8                                        | 19.25                                                                                                               | 6.119049                                                                | 1002.7                    | 13.6                            | 25.43                                        | 443.852                            | 43.7                    | A                                                  | 4.82                                                                                            | 7.79                                                    | 29.4                                 | 2                                                                                     | 15.32944                                                                                 | 596                                                                                                         |
|           | 2020 | 110225                | 11900.6011                           | 39306                               | 8.62%                                                               | 512.36454                                    | 19.25                                                                                                               | 6.0838718                                                               | 760.4                     | 13.2                            | 13.87                                        | 291.353                            | 39.71                   | A                                                  | 2.61                                                                                            | 9.06                                                    | 26.21                                | 3                                                                                     | 14.71831                                                                                 | 1011                                                                                                        |
| Xuzhou    | 2022 | 93731                 | 11441.09331                          | 42610                               | 8.58%                                                               | 767                                          | 25.23                                                                                                               | 6.9308643                                                               | 801.3                     | 16.4                            | 22.6                                         | 1189.87                            | 44.6                    | A                                                  | 1.31                                                                                            | 12.3                                                    | 22.5                                 | 6                                                                                     | 6.8689427                                                                                | 1849                                                                                                        |
|           | 2021 | 88419                 | 11124.72947                          | 40842                               | 9.11%                                                               | 767                                          | 25.23                                                                                                               | 6.7785346                                                               | 1204.8                    | 16.2                            | 52.58                                        | 1181.95                            | 43.3                    | A                                                  | 1.31                                                                                            | 12.9                                                    | 22.7                                 | 6                                                                                     | 7.0407489                                                                                | 2681                                                                                                        |
|           | 2020 | 80288                 | 10548.19956                          | 37532                               | 10.21%                                                              | 772                                          | 25.23                                                                                                               | 6.5390416                                                               | 1067.7                    | 16                              | 37.43                                        | 1180.37                            | 43.1                    | A                                                  | 1.31                                                                                            | 6.7                                                     | 23.4                                 | 7                                                                                     | 8.027533                                                                                 | 2266                                                                                                        |
|           | 2022 | 101169                | 11351.59782                          | 41049                               | 9.29%                                                               | 10057                                        | 27.8                                                                                                                | 8.8601715                                                               | 441.4                     | 15.9                            | 4.78                                         | 370.13                             | 39.3                    | B                                                  | 0.54                                                                                            | 8.06                                                    | 10.3                                 | 2                                                                                     | 22.345483                                                                                | 1453                                                                                                        |
| Zhengzhou | 2021 | 100092                | 12750.39246                          | 39511                               | 7.23%                                                               | 9433.51                                      | 27.6                                                                                                                | 8.6087127                                                               | 1570.5                    | 16.9                            | 24.66                                        | 373.04                             | 41.6                    | B                                                  | 0.82                                                                                            | 8.33                                                    | 10.57                                | 2                                                                                     | 19.263074                                                                                | 2124                                                                                                        |
|           | 2020 | 94911                 | 13639.46117                          | 24783                               | 7.31%                                                               | 9417                                         | 28.1                                                                                                                | 8.311252                                                                | 676.7                     | 16.5                            | 5.27                                         | 386.62                             | 41.5                    | B                                                  | 0.53                                                                                            | 7.78                                                    | 9.91                                 | 5                                                                                     | 19.167987                                                                                | 2400                                                                                                        |
|           | 2022 | 56075                 | 9731.556503                          | 15370                               | 12.15%                                                              | 5351                                         | 37                                                                                                                  | 7.2904051                                                               | 458.3                     | 15.9                            | 5.03                                         | 873.06                             | 46.3                    | B                                                  | 0.28                                                                                            | 8.61                                                    | 22.3                                 | 2                                                                                     | 20.082816                                                                                | 1015                                                                                                        |
|           | 2021 | 53173                 | 8984.728033                          | 24573                               | 11.83%                                                              | 5351                                         | 37.6                                                                                                                | 6.9968619                                                               | 1224.1                    | 16.6                            | 14.96                                        | 869.77                             | 42.6                    | B                                                  | 0.57                                                                                            | 8.33                                                    | 22.05                                | 2                                                                                     | 14.078675                                                                                | 44                                                                                                          |
| Kaifeng   | 2020 | 49166                 | 8919.047619                          | 31868                               | 11.79%                                                              | 5342                                         | 37.8                                                                                                                | 6.6695652                                                               | 589.3                     | 16.2                            | 6.52                                         | 870.86                             | 45.5                    | B                                                  | 0.23                                                                                            | 8.28                                                    | 21.56                                | 0                                                                                     | 15.942029                                                                                | 368                                                                                                         |
|           | 2022 | 60739                 | 3444.333636                          | 33733                               | 19.25%                                                              | 2709                                         | 24.79                                                                                                               | 3.4983379                                                               | 834.4                     | 16.7                            | 8.4                                          | 518.303                            | 44.42                   | A                                                  | 0.19                                                                                            | 9.0323                                                  | 29.32                                | 2                                                                                     | 13.748485                                                                                | 86                                                                                                          |
| Bengbu    | 2021 | 60117                 | 3288.08                              | 31972.4                             | 10.35%                                                              | 2433                                         | 24.79                                                                                                               | 6.703024                                                                | 948.9                     | 16.7                            | 14.47                                        | 634.248                            | 43.6                    | A                                                  | 0.14                                                                                            | 10.430435                                               | 10.134402                            | 2                                                                                     | 12.242424                                                                                | 361                                                                                                         |
|           | 2020 | 63209                 | 3259.399                             | 39116                               | 10.81%                                                              | 2399                                         | 24.79                                                                                                               | 6.5471211                                                               | 1101.3                    | 16.3                            | 16.6                                         | 636.088                            | 42.6                    | A                                                  | 0.12                                                                                            | 10.273128                                               | 9.8373354                            | 2                                                                                     | 12.966667                                                                                | 365                                                                                                         |
| Shanghai  | 2022 | 179907                | 37952.162                            | 84834                               | 13.93%                                                              | 3905                                         | 23.721494                                                                                                           | 17.36                                                                   | 1044.1                    | 14.8                            | 27.55                                        | 271.8                              | 38.1                    | A                                                  | 4.66262                                                                                         | 17.95                                                   | 5                                    | 25                                                                                    | 36.696141                                                                                | 815                                                                                                         |
|           | 2021 | 173600                | 33872.479                            | 72232                               | 7.50%                                                               | 3926                                         | 23.721494                                                                                                           | 6.1                                                                     | 1388.2                    | 18.1                            | 45.59                                        | 266.8                              | 37.73                   | A                                                  | 4.66262                                                                                         | 19.08                                                   | 4.81                                 | 25                                                                                    | 44.553859                                                                                | 634                                                                                                         |
|           | 2020 | 156800                | 32660.04                             | 78027                               | 6.80%                                                               | 3830                                         | 22.775194                                                                                                           | 5.8                                                                     | 1660.8                    | 17.8                            | 49.88                                        | 257.8                              | 37.32                   | A                                                  | 4.66262                                                                                         | 13.92                                                   | 4.76                                 | 34                                                                                    | 26.46449                                                                                 | 837                                                                                                         |
|           | 2022 | 178781                | 19336                                | 76643                               | 9.34%                                                               | 1349                                         | 26.447368                                                                                                           | 7.45                                                                    | 819.8                     | 17.6                            | 18.6                                         | 262.27                             | 44.96                   | A                                                  | 17.63                                                                                           | 12.3                                                    | 26.4                                 | 7                                                                                     | 34.549356                                                                                | 932                                                                                                         |
| Nanjing   | 2021 | 173824                | 19396                                | 73593                               | 8.27%                                                               | 1639                                         | 26.447368                                                                                                           | 7.013                                                                   | 1267.1                    | 17.6                            | 28.31                                        | 260.02                             | 44.96                   | A                                                  | 21.34                                                                                           | 12.51                                                   | 25.78                                | 7                                                                                     | 30.793991                                                                                | 1075                                                                                                        |
|           | 2020 | 159322                | 18866                                | 67553                               | 6.89%                                                               | 1614                                         | 26.447368                                                                                                           | 6.753                                                                   | 1294.4                    | 17.1                            | 23.77                                        | 251.48                             | 44.69                   | A                                                  | 13.59                                                                                           | 12.51                                                   | 25                                   | 12                                                                                    | 28.18884                                                                                 | 936                                                                                                         |
| Hefei     | 2022 | 125798                | 14326.13                             | 48820                               | 8.26%                                                               | 5081                                         | 29.08                                                                                                               | 6.4138468                                                               | 805.8                     | 16.9                            | 23.65                                        | 202.08                             | 45.96                   | A                                                  | 43.59                                                                                           | 16.61                                                   | 14.91                                | 6                                                                                     | 8.054429                                                                                 | 795                                                                                                         |
|           | 2021 | 121187                | 15547                                | 46009                               | 6.63%                                                               | 5014                                         | 19.893276                                                                                                           | 6.2131459                                                               | 1151.2                    | 16.7                            | 48.86                                        | 696.104                            | 44.18                   | A                                                  | 10.26                                                                                           | 15.79                                                   | 14.38                                | 6                                                                                     | 6.6872999                                                                                | 2164                                                                                                        |
|           | 2020 | 108427                | 15011                                | 41619.2                             | 7.44%                                                               | 4216                                         | 19.893276                                                                                                           | 6.3256812                                                               | 1523                      | 16.2                            | 87.41                                        | 689.089                            | 41.99                   | A                                                  | 10.39                                                                                           | 15.46                                                   | 18.76                                | 12                                                                                    | 7.1387407                                                                                | 2368                                                                                                        |
|           | 2022 | 121630                | 15622.608                            | 51481                               | 9.14%                                                               | 1758                                         | 30.64                                                                                                               | 6.3843474                                                               | 1091.3                    | 17.9                            | 24.31                                        | 339.548                            | 45.84                   | A                                                  | 0.63                                                                                            | 13.87                                                   | 25.91                                | 2                                                                                     | 12.046575                                                                                | 1329                                                                                                        |
| Wuhu      | 2021 | 117526                | 11311.729                            | 48668                               | 9.02%                                                               | 1759                                         | 25.01                                                                                                               | 6.45                                                                    | 1309.1                    | 17.6                            | 38.11                                        | 398.99                             | 46.68                   | A                                                  | 1.3                                                                                             | 14.28                                                   | 25.45                                | 2                                                                                     | 4.9287671                                                                                | 914                                                                                                         |
|           | 2020 | 102964                | 13327.02                             | 44588                               | 9.18%                                                               | 1794                                         | 26.396011                                                                                                           | 6.37                                                                    | 1888.5                    | 17.2                            | 60.13                                        | 225.889                            | 41.01                   | A                                                  | 1.28                                                                                            | 14.08                                                   | 24.41                                | 4                                                                                     | 4.5863014                                                                                | 1024                                                                                                        |
| Hangzhou  | 2022 | 152588                | 20540.482                            | 70281                               | 10.36%                                                              | 4392                                         | 42.2                                                                                                                | 6.550501                                                                | 1501.9                    | 18.4                            | 126.27                                       | 247.92                             | 40.96                   | A                                                  | 136.06                                                                                          | 13.92                                                   | 13.81                                | 8                                                                                     | 29.490393                                                                                | 3131                                                                                                        |
|           | 2021 | 150998                | 20829.974                            | 67709                               | 7.17%                                                               | 4371                                         | 41.1                                                                                                                | 6.4387086                                                               | 1952.1                    | 18.8                            | 189.11                                       | 246.26                             | 39.74                   | A                                                  | 145.06                                                                                          | 13.53                                                   | 12.55                                | 8                                                                                     | 29.490393                                                                                | 2419                                                                                                        |
|           | 2020 | 137474                | 19991.977                            | 61879                               | 7.20%                                                               | 3789                                         | 41.6                                                                                                                | 6.4649394                                                               | 1664.2                    | 18.3                            | 216.69                                       | 282.21                             | 43.36                   | A                                                  | 144.2                                                                                           | 13.54                                                   | 12.42                                | 8                                                                                     | 28.869674                                                                                | 2705                                                                                                        |
|           | 2022 | 90572                 | 12527.853                            | 58040                               | 10.19%                                                              | 1670                                         | 28.488946                                                                                                           | 5.04                                                                    | 1456.4                    | 18.628571                       | 70.51                                        | 203.53                             | 44.01                   | A                                                  | 4.37                                                                                            | 12.12                                                   | 15.46                                | 5                                                                                     | 7.6292961                                                                                | 1060                                                                                                        |
| Taizhou   | 2021 | 87220                 | 12534.604                            | 55499                               | 9.65%                                                               | 1613                                         | 28.488946                                                                                                           | 4.73                                                                    | 2166.1                    | 18.985714                       | 140.47                                       | 203.71                             | 42.61                   | A                                                  | 8.16                                                                                            | 12.49                                                   | 24.67                                | 5                                                                                     | 5.2473605                                                                                | 106                                                                                                         |
|           | 2020 | 79520                 | 11087.79                             | 50643                               | 9.68%                                                               | 1584                                         | 28.488946                                                                                                           | 4.77                                                                    | 1243                      | 18.914286                       | 59.45                                        | 200.34                             | 43.89                   | A                                                  | 4.37                                                                                            | 10.36                                                   | 24.50                                | 3                                                                                     | 5.9688175                                                                                | 185                                                                                                         |
| Wenzhou   | 2022 | 83107                 | 11754.685                            | 73326                               | 11.97%                                                              | 2682                                         | 38.848882                                                                                                           | 4.8388263                                                               | 1431.2                    | 18.9                            | 104.3                                        | 220.89                             | 39.79                   | A                                                  | 11.42                                                                                           | 11.8                                                    | 15.69                                | 6                                                                                     | 14.122002                                                                                | 71                                                                                                          |
|           | 2021 | 79647                 | 11060.81                             | 69678                               | 10.58%                                                              | 2556                                         | 39.328364                                                                                                           | 4.6834629                                                               | 2021.6                    | 19.3                            | 177.99                                       | 217.21                             | 37.65                   | A                                                  | 13.03                                                                                           | 11.78                                                   | 15.04                                | 6                                                                                     | 14.165798                                                                                | 57                                                                                                          |
|           | 2020 | 71553                 | 10714.18                             | 63481                               | 10.27%                                                              | 2238                                         | 38.85349                                                                                                            | 4.9352039                                                               | 266.9                     | 19.2                            | 82.27                                        | 215.48                             | 37.85                   | A                                                  | 9.66                                                                                            | 10.92                                                   | 16.72                                | 5                                                                                     | 6.861319                                                                                 | 21                                                                                                          |
|           | 2022 | 135200                | 15030.421                            | 40678                               | 6.95%                                                               | 4338                                         | 27.747799                                                                                                           | 7.669424                                                                | 1445.3                    | 18.9                            | 97.04                                        | 367.78                             | 46.48                   | B                                                  | 5.63                                                                                            | 13.06                                                   | 17.43                                | 4                                                                                     | 14.192843                                                                                | 108                                                                                                         |
